# Supplementary material
Source: ML conference proceedings conference paper supplement (https://openreview.net/forum?id=toR64fsPir)
Supplement: supplementary_material [file attachment]

---

# Supplement to "Structure-Preserving Embedding of Multi-layer Networks"

---

Anonymous Author(s)

Affiliation

Address

email

1 This supplement file contains the appendixes of the paper "Structure-Preserving Embedding of Multi-  
2 layer Networks". In Appendix A, we summarize the projected gradient descent algorithm developed  
3 in Section 2 of the paper. Appendix B contains the detailed cross-validation procedure in selecting  
4 the tuning parameter  $\lambda_n$ . Additional simulation studies are provided in Appendix C. In Appendix D,  
5 we provide an eigenvalue plot of the WAT dataset discussed in Section 4.2 of the paper. All technical  
6 proofs and necessary lemmas are included in Appendix E.

## 7 A Summary of the projected gradient descent algorithm

8 For easy of presentation, we denote the projection result from Step 1 to Step 3 discussed in Section  
9 2.3 as  $P_{\Omega_\alpha \times \Omega_\beta}(\tilde{\alpha}, \tilde{\beta})$ . The developed projected gradient descent algorithm can be summarized in  
10 Algorithm 1.

---

### Algorithm 1: Projected gradient descent (PGD)

---

**Input** : Adjacency tensor  $\mathcal{A}$ , sparsity factor  $s_n$ , number of communities  $K$ , embedding  
dimension  $R$ , constraint parameter  $\xi$ , tuning parameter  $\lambda_n$ , learning rate  $\eta$ , number of  
iterations  $T$ .

**Output** : Estimators of  $\alpha$  and  $\beta$ , estimated vertex community memberships and community  
centers.

```
1 Initialize  $\alpha^{(0)}, \beta^{(0)}$  and hence obtain  $Z^{(0)}, C^{(0)}$  by  $(1 + \delta)$ -approximation  $K$ -means algorithm.  
   Set  $t=0$ .  
2 while  $t < T$  do  
3    $\tilde{\alpha}^{(t+1)} = \alpha^{(t)} - \eta \nabla_{\alpha} \mathcal{L}_{\lambda}(\alpha^{(t)}, \beta^{(t)}; \mathcal{A}), \tilde{\beta}^{(t+1)} = \beta^{(t)} - \eta \nabla_{\beta} \mathcal{L}_{\lambda}(\alpha^{(t)}, \beta^{(t)}; \mathcal{A});$   
4    $(\alpha^{(t+1)}, \beta^{(t+1)}) = P_{\Omega_{\alpha} \times \Omega_{\beta}}(\tilde{\alpha}^{(t+1)}, \tilde{\beta}^{(t+1)});$   
5   Apply  $(1 + \delta)$ -approximation  $K$ -means algorithm to  $\alpha^{(t+1)}$  to obtain  $Z^{(t+1)}$  and  $C^{(t+1)}$ .  
6   if  $\frac{|\mathcal{L}_{\lambda}(\alpha^{(t+1)}, \beta^{(t+1)}; \mathcal{A}) - \mathcal{L}_{\lambda}(\alpha^{(t)}, \beta^{(t)}; \mathcal{A})|}{\mathcal{L}_{\lambda}(\alpha^{(t)}, \beta^{(t)}; \mathcal{A})} < 10^{-6}$  then  
7     break.  
8   end  
9    $t = t+1$ .  
10 end
```

---

## 11 B Selecting $\lambda_n$

12 In this appendix, we provide the detailed tuning procedure for selecting  $\lambda_n$ . Specifically, let  $\Lambda =$   
13  $\{\lambda_{n1}, \dots, \lambda_{nQ}\}$  be the set of  $Q$  candidates of  $\lambda_n$ ,  $p_0$  be the fraction of training data, and  $\kappa$  be the  
14 number of repetitions. For each repetition  $\kappa_0$ , we first sample the training data from the adjacency  
15 tensor  $\mathcal{A}$  such that  $a_{i,j,m}$  will be sampled independently with probability  $p_0$ , for any  $i \leq j$ . Denote

16  $\Delta$  be the index set of the training data. For each candidate  $\lambda_{nq} \in \Lambda$ , we apply Algorithm 1 to solve  
 17 for  $(\alpha^{\kappa_0, q}, \beta^{\kappa_0, q}) \in \Omega_\alpha \times \Omega_\beta$  that minimizes

$$\frac{1}{|\Delta|} \sum_{(i,j,m) \in \Delta} L(\theta_{i,j,m}, a_{i,j,m}) + \lambda_{nq} J(\alpha), \quad (1)$$

where  $|\Delta|$  is the cardinality of  $\Delta$ . We then evaluate the negative log-likelihood over the held-out set

$$l^{\kappa_0, q} = \frac{1}{|\Delta^c|} \sum_{(i,j,m) \in \Delta^c} L(\theta_{i,j,m}^{\kappa_0, q}, a_{i,j,m}),$$

where  $\Delta^c$  is the complement of  $\Delta$  and  $\theta_{i,j,m}^{\kappa_0, q} = \mathcal{I} \times_1 (\alpha_{i,\cdot}^{\kappa_0, q})^T \times_2 (\alpha_{j,\cdot}^{\kappa_0, q})^T \times_3 (\beta_{m,\cdot}^{\kappa_0, q})^T$ . Finally, we select  $\lambda_n$  from  $\Lambda$  such that it minimizes the averaged held-out loss over  $\kappa$  repetitions; that is,  $\lambda_n = \lambda_{nq^*}$  with

$$q^* = \arg \min_{q \in [Q]} \frac{1}{\kappa} \sum_{\kappa_0=1}^{\kappa} l^{\kappa_0, q}.$$

18 We remark that when solving (1), one needs to replace  $\mathcal{T}$  by  $\mathcal{T} * \mathcal{B}$ , to obtain the corresponding  
 19 gradients associated with the training data in the PGD algorithm. Herein,  $\mathcal{B} \in \{0, 1\}^{n \times n \times M}$  is the  
 20 binary indicator tensor associated with  $\Delta$  such that  $\mathcal{B}_{i,j,m} = 1$  if and only if  $(i, j, m) \in \Delta$ . Similarly,  
 21 when estimating  $s_n$  inside the cross-validation process by equation (7) labeled in the paper, one need  
 22 to replace the coefficient  $\frac{1}{nM}$  by  $\frac{1}{nMp_0}$  and  $\mathcal{A}$  by  $\mathcal{A} * \tilde{\mathcal{B}}$ , where  $\tilde{\mathcal{B}}$  is a symmetrization version of  $\mathcal{B}$   
 23 such that  $\tilde{\mathcal{B}}_{i,j,m} = \tilde{\mathcal{B}}_{j,i,m} = \mathcal{B}_{i,j,m}$ , for  $i \leq j, m \in [M]$ .

## 24 C Additional simulation studies

25 As network gets sparser or community sizes gets more unbalanced, it becomes more difficult to  
 26 differentiate vertices community memberships based on the observed multi-layer network. In this  
 27 Appendix, we provide additional simulation studies of two scenarios. In Scenario I, we study the  
 28 performances of TLSM and its competitors on networks with various sparsity, while in Scenario  
 29 II, we study the performances of TLSM and its competitors on networks with various levels of  
 30 unbalanced structures.

31 **Scenario I:** The multi-layer network generating process is the same as that descired in the paper,  
 32 except that we vary  $(n, s_n) \in \{200, 400\} \times \{0.025i : i \in [8]\}$  and fix  $(M, K) = (5, 4)$ . The  
 33 averaged Hamming errors with 95% confidence intervals over 50 replications of all methods are  
 34 plotted in Figure 1.

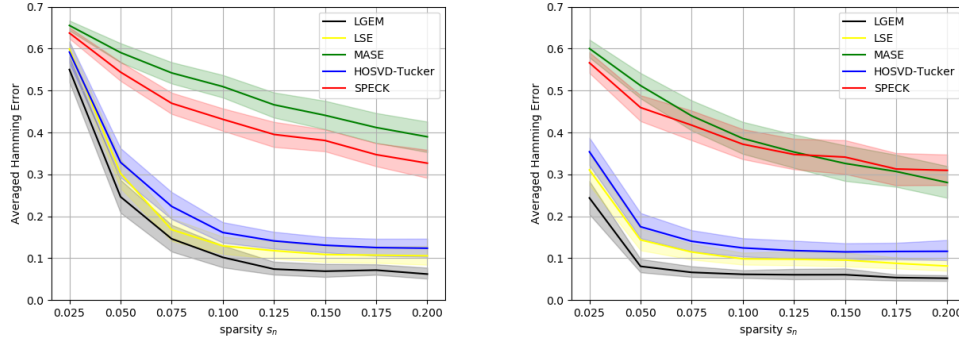

Figure 1: The averaged Hamming errors with 95% confidence intervals over 50 replications against various values of  $s_n$  in Scenario I with  $n = 200$  (Left) and  $400$  (Right).

35 **Scenario II:** The multi-layer network generating process is the same as that descired in the paper,  
 36 except that we generate  $\psi \sim \text{Multi}(1, \pi)$  and vary  $n \in \{200, 400\}$  while fixing  $(M, K) = (5, 4)$ ,

where  $\pi = (\pi_1, \pi_2, \pi_3, \pi_4) = (0.25+p, 0.25+p, 0.25-p, 0.25-p)$  with  $p \in \{1/24, 1/12, 1/8, 1/6\}$ . The averaged Hamming errors with 95% confidence intervals over 50 replications of all methods are plotted in Figure 2.

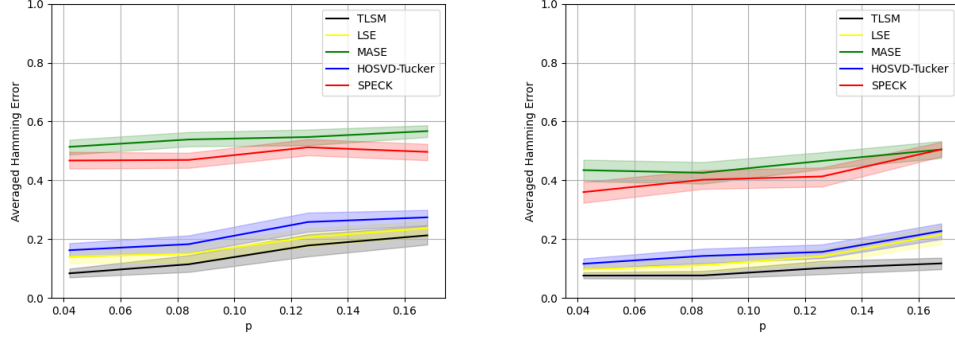

Figure 2: The averaged Hamming error with 95% confidence interval over 50 replications against various values of  $p$  in Scenario II with  $n = 200$  (Left) and  $400$  (Right).

It is evident that TLSM consistently outperforms the other competitors in both scenarios. In Scenario I, as  $s_n$  becomes larger, the averaged hamming errors of all methods decrease as expected, and TLSM and LSE perform the best even for relatively small  $s_n$ . In Scenario II, the averaged hamming errors of all methods increase gradually when the networks get more and more unbalanced, whereas TLSM appears to be more robust against the unbalancedness.

## D Eigenvalue plot of the WAT dataset

In this appendix, we provide a leading singular value plot of the mode-1 matricization of the WAT dataset as in Figure 3. Note that the mode-1 matricization of a tensor is to unfold it into a matrix by stacking its mode-1 fibers as the columns of its matricization. It is clear from Figure 3 that the 7th leading singular value of the mode-1 matricization of the WAT dataset is an elbow point, which suggests there are 6 potential communities among the vertices. We hence set  $K = 6$  in our analysis at Section 4.2. Such an eigen-gap investigation approach has been popularly employed to determine the number of communities for a network data in literature [1, 4] when it is unknown.

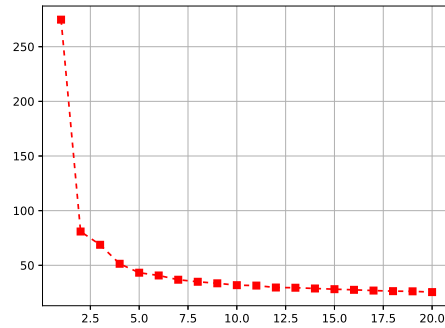

Figure 3: The first 20 leading singular values of the mode-1 matricization of the WAT dataset.

## E Technical proofs

All Technical proofs and necessary lemmas are included in this appendix.

55 To begin with, we define the followings. For a Bernoulli random variable  $Y$  with expectation  
 56  $p = s_n(1 + \exp(-\theta))^{-1}$  and probability mass function  $p(y; \theta)$ , the discrete Hellinger distance  
 57 between  $p(y; \theta)$  and  $p(y; \theta^*)$  is defined as

$$d(\theta, \theta^*) = \left[ (p^{1/2} - (p^*)^{1/2})^2 + ((1-p)^{1/2} - (1-p^*)^{1/2})^2 \right]^{1/2},$$

58 and the deviation of  $\Theta$  from  $\Theta^*$  can be assessed by the averaged squared Hellinger distance,

$$D^2(\Theta, \Theta^*) = \frac{1}{\varphi(n, M)} \sum_{m=1}^M \sum_{i \leq j} d^2(\theta_{i,j,m}, \theta_{i,j,m}^*).$$

59 In the proof of the main result, we will use the follow inequality several times.

**Lemma 1.** Let  $\mathcal{I}$  be the order three  $R$ -dimensional identity matrix. For any matrix  $\mathbf{A} \in \mathbb{R}^{n \times R}$ ,  
 $\mathbf{B} \in \mathbb{R}^{n \times R}$  and  $\mathbf{C} \in \mathbb{R}^{M \times R}$ , we have

$$\|\mathcal{I} \times_1 \mathbf{A} \times_2 \mathbf{B} \times_3 \mathbf{C}\|_F \leq \min\{\sqrt{M}\|\mathbf{C}\|_{\text{vec}(\infty)}, \|\mathbf{C}\|_F\} \|\mathbf{A}\|_F \|\mathbf{B}\|_F,$$

60 where  $\|\mathbf{C}\|_{\text{vec}(\infty)}$  is the  $l_\infty$ -norm of the vectorization of  $\mathbf{C}$ .

**Proof of Lemma 1.** The general Hölder inequality yields that the absolute value of the  $(i_1, i_2, i_3)$ -th  
 entry of  $\mathcal{I} \times_1 \mathbf{A} \times_2 \mathbf{B} \times_3 \mathbf{C}$  is upper bounded as

$$|(\mathcal{I} \times_1 \mathbf{A} \times_2 \mathbf{B} \times_3 \mathbf{C})_{i_1, i_2, i_3}| = |\mathcal{I} \times_1 \mathbf{A}_{i_1, \cdot}^T \times_2 \mathbf{B}_{i_2, \cdot}^T \times_3 \mathbf{C}_{i_3, \cdot}^T| \leq \|\mathbf{A}_{i_1, \cdot}\| \|\mathbf{B}_{i_2, \cdot}\| \|\mathbf{C}_{i_3, \cdot}\|.$$

61 Consequently,

$$\begin{aligned} \|\mathcal{I} \times_1 \mathbf{A} \times_2 \mathbf{B} \times_3 \mathbf{C}\|_F^2 &= \sum_{i_1, i_2, i_3} |(\mathcal{I} \times_1 \mathbf{A} \times_2 \mathbf{B} \times_3 \mathbf{C})_{i_1, i_2, i_3}|^2 \\ &\leq M \|\mathbf{C}\|_{\text{vec}(\infty)}^2 \sum_{i_1, i_2} \|\mathbf{A}_{i_1, \cdot}\|^2 \|\mathbf{B}_{i_2, \cdot}\|^2 = M \|\mathbf{C}\|_{\text{vec}(\infty)}^2 \|\mathbf{A}\|_F^2 \|\mathbf{B}\|_F^2. \end{aligned} \quad (2)$$

62 Besides, the Cauchy-Schwarz inequality implies that the absolute value of the  $(i_1, i_2, i_3)$ -th entry of  
 63  $\mathcal{I} \times_1 \mathbf{A} \times_2 \mathbf{B} \times_3 \mathbf{C}$  is upper bounded as

$$|(\mathcal{I} \times_1 \mathbf{A} \times_2 \mathbf{B} \times_3 \mathbf{C})_{i_1, i_2, i_3}| = \left| \sum_j \mathbf{A}_{i_1, j} \mathbf{B}_{i_2, j} \mathbf{C}_{i_3, j} \right| \leq \|\mathbf{A}_{i_1, \cdot}\| \|\mathbf{B}_{i_2, \cdot}\| \|\mathbf{C}_{i_3, \cdot}\|,$$

where  $\mathbf{A}_{i_1, \cdot} * \mathbf{B}_{i_2, \cdot}$  is the Hadamard product between  $\mathbf{A}_{i_1, \cdot}$  and  $\mathbf{B}_{i_2, \cdot}$ . Note that

$$\|\mathbf{A}_{i_1, \cdot} * \mathbf{B}_{i_2, \cdot}\| = \sqrt{\sum_j \mathbf{A}_{i_1, j}^2 \mathbf{B}_{i_2, j}^2} \leq \sqrt{\|\mathbf{A}_{i_1, \cdot}\|^2 \|\mathbf{B}_{i_2, \cdot}\|^2} = \|\mathbf{A}_{i_1, \cdot}\| \|\mathbf{B}_{i_2, \cdot}\|,$$

which leads to

$$|(\mathcal{I} \times_1 \mathbf{A} \times_2 \mathbf{B} \times_3 \mathbf{C})_{i_1, i_2, i_3}| \leq \|\mathbf{A}_{i_1, \cdot}\| \|\mathbf{B}_{i_2, \cdot}\| \|\mathbf{C}_{i_3, \cdot}\|.$$

64 It then follows that

$$\|\mathcal{I} \times_1 \mathbf{A} \times_2 \mathbf{B} \times_3 \mathbf{C}\|_F^2 \leq \sum_{i_1, i_2, i_3} \|\mathbf{A}_{i_1, \cdot}\|^2 \|\mathbf{B}_{i_2, \cdot}\|^2 \|\mathbf{C}_{i_3, \cdot}\|^2 = \|\mathbf{A}\|_F^2 \|\mathbf{B}\|_F^2 \|\mathbf{C}\|_F^2. \quad (3)$$

65 Finally, the desired result immediately follows from (2) and (3).  $\square$

66 **Proof of Proposition 1.** Denote  $S = \{\Theta \in \Omega | KL(\Theta^* || \Theta) \geq 4\epsilon_n\}$ . Let

$$\begin{aligned} I &:= P\left(\sup_S (\mathcal{L}_\lambda(\Theta^*; \mathcal{A}) - \mathcal{L}_\lambda(\Theta; \mathcal{A})) \geq -\epsilon_n\right) \\ &= P\left(\sup_S \frac{1}{\varphi(n, M)} \sum_{m=1}^M \sum_{i \leq j} (L(\theta_{i,j,m}^*; a_{i,j,m}) - L(\theta_{i,j,m}; a_{i,j,m})) + \lambda_n (J(\Theta^*) - J(\Theta)) \geq -\epsilon_n\right). \end{aligned}$$

67 We now decompose  $S$  as follows. Let  $S_u = \{\Theta \in \Omega | 2^{u+1}\epsilon_n \leq KL(\Theta^* || \Theta) < 2^{u+2}\epsilon_n\}$ , for  
 68  $u = 1, 2, \dots$ . It immediately follows that  $S = \bigcup_{u=1}^{+\infty} S_u$ , and then

$$\begin{aligned} I &\leq \sum_{u=1}^{+\infty} P\left(\sup_{S_u} \frac{1}{\varphi(n, M)} \sum_{m=1}^M \sum_{i \leq j} (L(\theta_{i,j,m}^*; a_{i,j,m}) - L(\theta_{i,j,m}; a_{i,j,m})) + \lambda_n (J(\Theta^*) - J(\Theta)) \geq -\epsilon_n\right) \\ &:= \sum_{u=1}^{+\infty} I_u. \end{aligned}$$

69 Define an empirical process  $\nu_{n,M}(\Theta, \mathcal{A}) = \frac{1}{\varphi(n, M)} \sum_{m=1}^M \sum_{i \leq j} \left( L(\theta_{i,j,m}^*; a_{i,j,m}) - \right.$   
70  $L(\theta_{i,j,m}; a_{i,j,m}) - \mathbb{E}(L(\theta_{i,j,m}^*; a_{i,j,m}) - L(\theta_{i,j,m}; a_{i,j,m})) \Big)$ , for some independent but not iden-  
71 tical data. It then follows that

$$I_u \leq P \left( \sup_{S_u} \nu_{n,M}(\Theta, \mathcal{A}) \geq \inf_{S_u} \left( KL(\Theta^* || \Theta) + \lambda_n(J(\Theta) - J(\Theta^*)) \right) - \epsilon_n \right).$$

Since  $\inf_{S_u} \left( KL(\Theta^* || \Theta) + \lambda_n(J(\Theta) - J(\Theta^*)) \right) - \epsilon_n \geq 2^{u+1} \epsilon_n - \epsilon_n - \epsilon_n \geq 2^u \epsilon_n$  and Lemma 2 shows that  $\mathbb{E} \sup_{S_u} \nu_{n,M}(\Theta, \mathcal{A}) \leq 2^{u-1} \epsilon_n$  when  $n$  is large enough, we have

$$I_u \leq P \left( \sup_{S_u} \nu_{n,M}(\Theta, \mathcal{A}) \geq 2^u \epsilon_n \right) \leq P \left( \sup_{S_u} \nu_{n,M}(\Theta, \mathcal{A}) \geq \mathbb{E} \sup_{S_u} \nu_{n,M}(\Theta, \mathcal{A}) + 2^{u-1} \epsilon_n \right).$$

72 Let  $Y$  be a Bernoulli random variable with expectation  $p = s_n(1 + \exp(-\theta))^{-1}$ , we have

$$\begin{aligned} \mathbb{E}(L(\theta; Y) - L(\theta^*; Y)) &= -2p^* \log \left( \left( \frac{p}{p^*} \right)^{1/2} \right) - 2(1 - p^*) \log \left( \left( \frac{1-p}{1-p^*} \right)^{1/2} \right) \\ &\geq -2p^* \left( \frac{p^{1/2}}{(p^*)^{1/2}} - 1 \right) - 2(1 - p^*) \left( \frac{(1-p)^{1/2}}{(1-p^*)^{1/2}} - 1 \right) \\ &= (p^{1/2} - (p^*)^{1/2})^2 + ((1-p)^{1/2} - (1-p^*)^{1/2})^2, \end{aligned}$$

73 where  $p^* = s_n(1 + \exp(-\theta^*))^{-1}$ . It immediately follows that  $D^2(\Theta, \Theta^*) \leq KL(\Theta^* || \Theta)$ . More-  
74 over, by Lagrange's mean value theorem, we further have

$$\begin{aligned} &\mathbb{E}(L(\theta; Y) - L(\theta^*; Y))^2 \\ &= 4p^* \left( \log(p^{1/2}) - \log((p^*)^{1/2}) \right)^2 + 4(1 - p^*) \left( \log((1-p)^{1/2}) - \log((1-p^*)^{1/2}) \right)^2 \\ &= 4p^* \eta_1^{-1} ((p^*)^{1/2} - p^{1/2})^2 + 4(1 - p^*)(1 - \eta_2)^{-1} ((1-p^*)^{1/2} - (1-p)^{1/2})^2, \end{aligned}$$

75 where  $\eta_1$  and  $\eta_2$  are some real numbers between  $p$  and  $p^*$ . Since  $(1 - \xi)s_n \leq p, p^* \leq \xi s_n$ , we  
76 have  $p^* \eta_1^{-1} \leq \frac{\xi}{1-\xi}$  and  $(1 - p^*)(1 - \eta_2)^{-1} \leq \frac{1-(1-\xi)s_n}{1-\xi s_n} \leq \frac{\xi}{1-\xi}$ , which leads to  $\mathbb{E}(L(\theta; Y) -$   
77  $L(\theta^*; Y))^2 \leq \frac{4\xi}{1-\xi} d^2(\theta, \theta^*)$ . On the set  $S_u$ , we have  $KL(\Theta^* || \Theta) < 2^{u+2} \epsilon_n$ . Therefore, the  
78 variance of  $\nu_{n,M}(\Theta, \mathcal{A})$  can be bounded as

$$\begin{aligned} \text{Var}(\nu_{n,M}(\Theta, \mathcal{A})) &\leq \frac{4}{\varphi^2(n, M)} \sum_{m=1}^M \sum_{i \leq j} \mathbb{E}(L(\theta_{i,j,m}; a_{i,j,m}) - L(\theta_{i,j,m}^*; a_{i,j,m}))^2 \\ &\leq \frac{4\xi}{(1-\xi)\varphi(n, M)} D^2(\Theta, \Theta^*) \leq \frac{4\xi}{(1-\xi)\varphi(n, M)} KL(\Theta^* || \Theta) < \frac{\xi 2^{u+4} \epsilon_n}{(1-\xi)\varphi(n, M)}. \end{aligned}$$

79 Also note that  $|L(\theta; Y) - L(\theta^*; Y)|$  can be upper bounded as

$$|L(\theta; Y) - L(\theta^*; Y)| \leq \max \left\{ \left| \log \frac{1 + \exp(-\theta)}{1 + \exp(-\theta^*)} \right|, \left| \log \frac{1 - s_n(1 + \exp(-\theta))^{-1}}{1 - s_n(1 + \exp(-\theta^*))^{-1}} \right| \right\} \leq \log 2 + \frac{\xi}{1-\xi},$$

80 where the last inequality comes from the fact that  $|\theta| \leq \frac{\xi}{1-\xi}$ . It follows that

$$\frac{1}{2(\log 2 + \frac{\xi}{1-\xi})} \left( L(\theta_{i,j,m}^*; a_{i,j,m}) - L(\theta_{i,j,m}; a_{i,j,m}) - \mathbb{E}(L(\theta_{i,j,m}^*; a_{i,j,m}) - L(\theta_{i,j,m}; a_{i,j,m})) \right) \in [-1, 1].$$

81 Denote  $\tilde{\nu}_{n,M}(\boldsymbol{\theta}; \mathcal{A}) = \varphi(n, M)\nu_{n,M}(\boldsymbol{\theta}; \mathcal{A})/(2\log 2 + \frac{2\xi}{1-\xi})$ . By the concentration inequality in  
 82 Theorem 1.1 of [2], we have

$$\begin{aligned} I_u &\leq \exp \left( - \frac{(\varphi(n, M)2^{u-1}\epsilon_n/(2\log 2 + \frac{2\xi}{1-\xi}))^2}{2\left(2\mathbb{E}\sup_{S_u} \tilde{\nu}_{n,M}(\boldsymbol{\theta}, \mathcal{A}) + \sup_{S_u} \text{Var}(\tilde{\nu}_{n,M}(\boldsymbol{\theta}, \mathcal{A}))\right) + 3\frac{\varphi(n, M)}{2(\log 2 + \frac{2\xi}{1-\xi})} * 2^{u-1}\epsilon_n} \right) \\ &< \exp \left( - \frac{(\varphi(n, M)2^{u-1}\epsilon_n/(2\log 2 + \frac{2\xi}{1-\xi}))^2}{2\left(\frac{\varphi(n, M)}{(\log 2 + \frac{2\xi}{1-\xi})} * 2^{u-1}\epsilon_n + \frac{\xi\varphi(n, M)}{4(1-\xi)(\log 2 + \frac{2\xi}{1-\xi})^2} * 2^{u+4}\epsilon_n\right) + 3\frac{\varphi(n, M)}{2(\log 2 + \frac{2\xi}{1-\xi})} * 2^{u-1}\epsilon_n} \right) \\ &= \exp \left( - \frac{2^u\varphi(n, M)\epsilon_n}{156\frac{\xi}{1-\xi} + 28\log 2} \right). \end{aligned}$$

Denote  $\zeta = \exp \left( - \frac{\varphi(n, M)\epsilon_n}{156\frac{\xi}{1-\xi} + 28\log 2} \right)$ . We have

$$I \leq \sum_{u=1}^{+\infty} \exp \left( - \frac{2^u\varphi(n, M)\epsilon_n}{156\frac{\xi}{1-\xi} + 28\log 2} \right) \leq \sum_{u=1}^{+\infty} \zeta^u = \frac{\zeta}{1-\zeta}.$$

83 As a result,  $I \leq (1 + I)\zeta \leq 2\zeta$ . □

84 **Lemma 2.** Let the set  $S_u$  and the empirical process  $\nu_{n,M}(\boldsymbol{\theta}; \mathcal{A})$  be defined in the proof of Proposition

85 1. If  $\frac{(n+M)R}{\varphi(n, M)\epsilon_n} \log \sqrt{\frac{1}{\epsilon_n}} \leq c_1$ , for some constant  $c_1$  that depends on  $\xi$  only, then for any  $u = 1, 2, \dots$ ,  
 86 we have  $E(\sup_{S_u} \nu_{n,M}(\boldsymbol{\theta}, \mathcal{A})) \leq 2^{u-1}\epsilon_n$ .

87 **Proof of Lemma 2.** Denote  $f(\theta_{i,j,m}; a_{i,j,m}) = L(\theta_{i,j,m}^*; a_{i,j,m}) - L(\theta_{i,j,m}; a_{i,j,m})$ , and hence  
 88  $\nu_{n,M}(\boldsymbol{\theta}, \mathcal{A}) = \varphi^{-1}(n, M) \sum_{m=1}^M \sum_{i \leq j} (f(\theta_{i,j,m}; a_{i,j,m}) - \mathbb{E}f(\theta_{i,j,m}; a_{i,j,m}))$ . Let  $\mathcal{A}' =$   
 89  $(a'_{i,j,m})$  be an independent copy of  $\mathcal{A}$  and  $\boldsymbol{\tau} = (\tau_{i,j,m})$  be a collection of independent Rademacher  
 90 random variables. By the standard symmetrization argument, we have

$$\begin{aligned} \mathbb{E}_{\mathcal{A}} \sup_{S_u} \nu_{n,M}(\boldsymbol{\theta}, \mathcal{A}) &\leq \frac{1}{\varphi(n, M)} \mathbb{E}_{\mathcal{A}, \mathcal{A}'} \sup_{S_u} \sum_{m=1}^M \sum_{i \leq j} (f(\theta_{i,j,m}; a_{i,j,m}) - f(\theta_{i,j,m}; a'_{i,j,m})) \\ &\leq \frac{2}{\varphi(n, M)} \mathbb{E}_{\mathcal{A}, \boldsymbol{\tau}} \sup_{S_u} \left| \sum_{m=1}^M \sum_{i \leq j} \tau_{i,j,m} f(\theta_{i,j,m}; a_{i,j,m}) \right|. \end{aligned}$$

91 Denote  $X(\boldsymbol{\theta}; \mathcal{A}) = \varphi^{-1/2}(n, M) \sum_{m=1}^M \sum_{i \leq j} \tau_{i,j,m} f(\theta_{i,j,m}; a_{i,j,m})$  as the conditional  
 92 Rademacher process. For any  $\boldsymbol{\theta}^{(1)}, \boldsymbol{\theta}^{(2)} \in S_u$ , and  $\omega \in \mathbb{R}$ , we have  $\mathbb{E}_{\boldsymbol{\tau}|\mathcal{A}} \exp \left( \omega(X(\boldsymbol{\theta}^{(1)}; \mathcal{A}) - \right.$   
 93  $X(\boldsymbol{\theta}^{(2)}; \mathcal{A})) \right) \leq \exp \left( \frac{1}{2}\omega^2\rho^2(\boldsymbol{\theta}^{(1)}, \boldsymbol{\theta}^{(2)}; \mathcal{A}) \right)$ , where

$$\rho^2(\boldsymbol{\theta}^{(1)}, \boldsymbol{\theta}^{(2)}; \mathcal{A}) = \frac{1}{\varphi(n, M)} \sum_{m=1}^M \sum_{i \leq j} (f(\theta_{i,j,m}^{(1)}; a_{i,j,m}) - f(\theta_{i,j,m}^{(2)}; a_{i,j,m}))^2,$$

94 showing that  $X(\boldsymbol{\theta}; \mathcal{A})$  is a sub-Gaussian process with respect to  $\rho$  when  $\mathcal{A}$  is given. Thus, by  
 95 Theorem 3.11 of [3], there exists a positive constant  $c_4$ , such that

$$\varphi^{-1/2}(n, M) \mathbb{E}_{\mathcal{A}, \boldsymbol{\tau}} \sup_{S_u} \left| \sum_{m=1}^M \sum_{i \leq j} \tau_{i,j,m} f(\theta_{i,j,m}; a_{i,j,m}) \right| \leq \frac{c_4}{2} \mathbb{E}_{\mathcal{A}} \int_0^{\text{diam}(S_u)} H^{1/2}(\varepsilon; S_u, \rho) d\varepsilon,$$

where  $\text{diam}(S_u)$  is the diameter of  $S_u$  and  $H(\varepsilon; S_u, \rho)$  is the metric entropy. Note that  
 $\left| \frac{dL(\theta_{i,j,m}; a_{i,j,m})}{d\theta_{i,j,m}} \right| = \left| \frac{\exp(-\theta_{i,j,m})}{1 - s_n + \exp(-\theta_{i,j,m})} (p_{i,j,m} - a_{i,j,m}) \right| < 1$ . Thus, both  $L(\theta_{i,j,m}; a_{i,j,m})$  and  
 $f(\theta_{i,j,m}; a_{i,j,m})$  are Lipschitz continuous with Lipschitz constant 1. Thus, for any  $\boldsymbol{\theta}^{(1)}, \boldsymbol{\theta}^{(2)} \in S_u$ ,  
 we have

$$\rho^2(\boldsymbol{\theta}^{(1)}, \boldsymbol{\theta}^{(2)}; \mathcal{A}) \leq \frac{1}{\varphi(n, M)} \sum_{m=1}^M \sum_{i \leq j} |\theta_{i,j,m}^{(1)} - \theta_{i,j,m}^{(2)}|^2 \leq \frac{1}{\varphi(n, M)} \|\boldsymbol{\theta}^{(1)} - \boldsymbol{\theta}^{(2)}\|_F^2.$$

96 By the triangle inequality and Lemma 1,

$$\begin{aligned}
\rho(\Theta^{(1)}, \Theta^{(2)}; \mathcal{A}) &\leq \frac{1}{\varphi^{1/2}(n, M)} \left( \|\mathcal{I} \times_1 (\alpha^{(1)} - \alpha^{(2)}) \times_2 \alpha^{(1)} \times_3 \beta^{(1)}\|_F \right. \\
&\quad \left. + \|\mathcal{I} \times_1 \alpha^{(2)} \times_2 (\alpha^{(1)} - \alpha^{(2)}) \times_3 \beta^{(1)}\|_F + \|\mathcal{I} \times_1 \alpha^{(2)} \times_2 \alpha^{(2)} \times_3 (\beta^{(1)} - \beta^{(2)})\|_F \right) \\
&\leq \frac{(\sqrt{\min\{M, R\}} \|\alpha^{(1)} - \alpha^{(2)}\|_F (\|\alpha^{(1)}\|_F + \|\alpha^{(2)}\|_F) + \min\{2\sqrt{M}, \|\beta^{(1)} - \beta^{(2)}\|_F\} \|\alpha^{(2)}\|_F^2)}{\varphi^{1/2}(n, M)} \\
&\leq \frac{n \log \frac{\xi}{1-\xi}}{\varphi^{1/2}(n, M)} \left( 2\sqrt{\min\{M, R\}} \left\| \frac{1}{\sqrt{\log \frac{\xi}{1-\xi}}} (\alpha^{(1)} - \alpha^{(2)}) \right\|_F + \sqrt{R} \min\left\{2\sqrt{\frac{M}{R}}, \frac{1}{\sqrt{R}} \|\beta^{(1)} - \beta^{(2)}\|_F\right\} \right).
\end{aligned}$$

97 This leads to

$$H(\varepsilon; S_u, \rho) \leq H\left(\frac{\varphi^{1/2}(n, M)\varepsilon}{4n\sqrt{\min\{M, R\}} \log \frac{\xi}{1-\xi}}; B(nR), \|\cdot\|\right) + H\left(\frac{\varphi^{1/2}(n, M)\varepsilon}{2n\sqrt{R} \log \frac{\xi}{1-\xi}}; B^h(MR), h\right),$$

98 where  $B(nR)$  is the unit ball with respect to the  $l_2$ -norm in  $\mathbb{R}^{nR}$ ,  $B^h(MR)$  is the Euclidean  
99 ball in  $\mathbb{R}^{MR}$  with radius  $\min\{2\sqrt{\frac{M}{R}}, 1\}$ ,  $h$  is a truncated distance such that  $h(\beta^{(1)}, \beta^{(2)}) =$   
100  $\min\{2\sqrt{\frac{M}{R}}, \frac{1}{\sqrt{R}} \|\beta^{(1)} - \beta^{(2)}\|_F\}$ , and  $H(\cdot; \cdot, \cdot)$  is the metric entropy.

101 In the case that  $2\sqrt{M} \geq \sqrt{R}$ , we have

$$\begin{aligned}
H\left(\frac{\varphi^{1/2}(n, M)\varepsilon}{2n\sqrt{R} \log \frac{\xi}{1-\xi}}; B^h(MR), h\right) &= H\left(\frac{\varphi^{1/2}(n, M)\varepsilon}{2n\sqrt{R} \log \frac{\xi}{1-\xi}}; B(MR), \|\cdot\|\right) \\
&\leq MR \log \frac{6n\sqrt{R} \log \frac{\xi}{1-\xi}}{\varphi^{1/2}(n, M)\varepsilon} \leq MR \log \frac{12\sqrt{2} \log \frac{\xi}{1-\xi}}{\varepsilon},
\end{aligned}$$

102 where  $B(MR)$  is the unit ball with respect to the  $l_2$  norm in  $\mathbb{R}^{MR}$ . In the case that  $2\sqrt{M} < \sqrt{R}$ , we  
103 have

$$H\left(\frac{\varphi^{1/2}(n, M)\varepsilon}{2n\sqrt{R} \log \frac{\xi}{1-\xi}}; B^h(MR), h\right) = H\left(\frac{\varphi^{1/2}(n, M)\varepsilon}{2n\sqrt{R} \log \frac{\xi}{1-\xi}} \cdot \frac{\sqrt{R}}{2\sqrt{M}}; B(MR), \|\cdot\|\right) \leq MR \log \frac{12\sqrt{2} \log \frac{\xi}{1-\xi}}{\varepsilon}.$$

104 Thus,  $H(\varepsilon; S_u, \rho)$  can be bounded as

$$H(\varepsilon; S_u, \rho) \leq nR \log \frac{12n\sqrt{\min\{M, R\}} \log \frac{\xi}{1-\xi}}{\varphi^{1/2}(n, M)\varepsilon} + MR \log \frac{12\sqrt{2} \log \frac{\xi}{1-\xi}}{\varepsilon} \leq (n+M)R \log \frac{12\sqrt{2} \log \frac{\xi}{1-\xi}}{\varepsilon}.$$

105 By concavity,

$$\begin{aligned}
\mathbb{E}_{\mathcal{A}} \sup_{S_u} \nu_{n, M}(\Theta; \mathcal{A}) &\leq \frac{c_4}{\varphi^{1/2}(n, M)} \mathbb{E}_{\mathcal{A}} \int_0^{\text{diam}(S_u)} \sqrt{(n+M)R \log \frac{12\sqrt{2} \log \frac{\xi}{1-\xi}}{\varepsilon}} d\varepsilon \\
&\leq c_4 \sqrt{\frac{(n+M)R}{\varphi(n, M)}} \int_0^{\sqrt{\mathbb{E}_{\mathcal{A}} \text{diam}^2(S_u)}} \sqrt{\log \frac{12\sqrt{2} \log \frac{\xi}{1-\xi}}{\varepsilon}} d\varepsilon.
\end{aligned}$$

106 Furthermore, according to the same argument of bounding the variance of  $\nu_{n, M}(\Theta, \mathcal{A})$ , we  
107 have  $\mathbb{E}_{\mathcal{A}} \rho^2(\Theta^{(1)}, \Theta^{(2)}; \mathcal{A}) \leq 2(\mathbb{E}_{\mathcal{A}} \rho^2(\Theta^{(1)}, \Theta^*; \mathcal{A}) + \mathbb{E}_{\mathcal{A}} \rho^2(\Theta^{(2)}, \Theta^*; \mathcal{A})) \leq 2(\frac{\xi}{1-\xi} 2^{u+2} \epsilon_n +$

108  $\frac{\xi}{1-\xi} 2^{u+2} \epsilon_n = \frac{\xi}{1-\xi} 2^{u+4} \epsilon_n$ , implying that  $\mathbb{E}_{\mathcal{A}} \text{diam}^2(S_u) \leq \frac{\xi}{1-\xi} 2^{u+4} \epsilon_n$ . Thus,

$$\begin{aligned} \mathbb{E}_{\mathcal{A}} \sup_{S_u} \nu_{n,M}(\Theta, \mathcal{A}) &\leq c_4 \sqrt{\frac{(n+M)R}{\varphi(n, M)}} \int_0^{\sqrt{\frac{\xi}{1-\xi} 2^{(u+4)} \epsilon_n}} \sqrt{\log \frac{12\sqrt{2} \log \frac{\xi}{1-\xi}}{\epsilon}} d\epsilon \\ &\leq \frac{12\sqrt{2}c_4 \sqrt{(n+M)R} \log \frac{\xi}{1-\xi}}{\sqrt{\varphi(n, M) \log \frac{12\sqrt{2} \log \frac{\xi}{1-\xi}}{\sqrt{\frac{\xi}{1-\xi} 2^{u+4} \epsilon_n}}}} \int_{12\sqrt{2} \log \frac{\xi}{1-\xi} / \sqrt{\frac{\xi}{1-\xi} 2^{u+4} \epsilon_n}}^{+\infty} \frac{\log \epsilon}{\epsilon^2} d\epsilon \\ &= c_4 \sqrt{\frac{2^{u+4}(n+M)R \frac{\xi}{1-\xi} \epsilon_n}{\varphi(n, M) \log \frac{12\sqrt{2} \log \frac{\xi}{1-\xi}}{\sqrt{\frac{\xi}{1-\xi} 2^{u+4} \epsilon_n}}}} \left(1 + \log \frac{12\sqrt{2} \log \frac{\xi}{1-\xi}}{\sqrt{\frac{\xi}{1-\xi} 2^{u+4} \epsilon_n}}\right) \\ &\leq c_5 \sqrt{\frac{2^{u+4}(n+M)R \epsilon_n}{\varphi(n, M)}} \log \sqrt{\frac{1}{\epsilon_n}}, \end{aligned}$$

109 for some positive constant  $c_5$  that depends on  $\xi$  only. Finally,

$$\mathbb{E}_{\mathcal{A}} \sup_{S_u} \nu_{n,M}(\Theta, \mathcal{A}) \leq 4\sqrt{2}c_5 \sqrt{\frac{(n+M)R}{\varphi(n, M)\epsilon_n}} \log \sqrt{\frac{1}{\epsilon_n}} \cdot 2^{u-1} \epsilon_n \leq 2^{u-1} \epsilon_n, \quad (4)$$

110 where the second inequality follows from the condition that  $\frac{(n+M)R}{\varphi(n, M)\epsilon_n} \log \sqrt{\frac{1}{\epsilon_n}} \leq c_1$  with  $c_1$  taking  
111 to be  $\frac{1}{32c_5^2}$ .  $\square$

112 **Proof of Theorem 1.** By definition of  $\hat{\Theta}$ , it follows from Proposition 1 that

$$\begin{aligned} P(D^2(\hat{\Theta}, \Theta^*) \geq 4\epsilon_n) &\leq P(KL(\Theta^* || \hat{\Theta}) \geq 4\epsilon_n) \\ &\leq P\left(\sup_{\{\Theta \in \Omega | KL(\Theta^* || \Theta) \geq 4\epsilon_n\}} \mathcal{L}_\lambda(\Theta^*) - \mathcal{L}_\lambda(\Theta) \geq -\epsilon_n\right) \\ &\leq 2 \exp\left(-\frac{\varphi(n, M)\epsilon_n}{156 \frac{\xi}{1-\xi} + 28 \log 2}\right). \end{aligned}$$

113 That is, with probability at least  $1 - 2 \exp\left(-\frac{\varphi(n, M)\epsilon_n}{156 \frac{\xi}{1-\xi} + 28 \log 2}\right)$ ,  $D^2(\hat{\Theta}, \Theta^*) \leq 4\epsilon_n$ .

114 Next, we bound the  $F$ -norm of the different between  $\hat{\Theta}$  and  $\Theta^*$ . Let  $g(x) = \log \frac{x^2}{s_n - x^2}$ . By  
115 Lagrange's mean value theorem, for any  $\Theta \in \Omega$ ,

$$|\theta_{i,j,m} - \theta_{i,j,m}^*| = |g(p_{i,j,m}^{1/2}) - g((p_{i,j,m}^*)^{1/2})| \leq \max\left\{\frac{2}{\sqrt{(1-\xi)s_n\xi}}, \frac{2}{\sqrt{\xi s_n(1-\xi)}}\right\} |p_{i,j,m}^{1/2} - (p_{i,j,m}^*)^{1/2}|.$$

Moreover,  $\xi > 1/2$  implies that  $\max\left\{\frac{2}{\sqrt{(1-\xi)s_n\xi}}, \frac{2}{\sqrt{\xi s_n(1-\xi)}}\right\} = \frac{2}{\sqrt{\xi s_n(1-\xi)}}$ . It then follows that  
have  $\frac{1}{\varphi(n, M)} \sum_{m=1}^M \sum_{i \leq j} (\theta_{i,j,m} - \theta_{i,j,m}^*)^2 \leq \frac{4}{s_n \xi (1-\xi)^2} D^2(\Theta, \Theta^*)$ . Particularly, for the estimator  $\hat{\Theta}$ , we

$$\frac{1}{n^2 M} \|\hat{\Theta} - \Theta^*\|_F^2 \leq \frac{8\varphi(n, M)}{n^2 M s_n \xi (1-\xi)^2} D^2(\hat{\Theta}; \Theta^*) \leq \frac{8}{s_n \xi (1-\xi)^2} D^2(\hat{\Theta}; \Theta^*) \leq \frac{32\epsilon_n}{s_n \xi (1-\xi)^2},$$

116 with probability at least  $1 - 2 \exp\left(-\frac{\varphi(n, M)\epsilon_n}{156 \frac{\xi}{1-\xi} + 28 \log 2}\right)$ .  $\square$

117 **Lemma 3.** Under the conditions of Theorem 1 and Assumption B, then there exists an absolute  
118 constant  $c_3$  that depends on  $\xi$  only, such that

$$\begin{aligned} &\frac{1}{n\sqrt{M}} \|\mathcal{I} \times_1 \hat{\mathbf{Z}} \hat{\mathbf{C}} \times_2 \hat{\mathbf{Z}} \hat{\mathbf{C}} \times_3 \hat{\beta} - \mathcal{I} \times_1 \mathbf{Z}^* \mathbf{C}^* \times_2 \mathbf{Z}^* \mathbf{C}^* \times_3 \beta^*\|_F \\ &\leq \left(\frac{4\sqrt{2}}{(1-\xi)\sqrt{\xi}} + c_3 \sqrt{\frac{(1+\delta) \min\{M, R\}}{M}}\right) \sqrt{\epsilon_n s_n^{-1}}, \end{aligned}$$

119 with probability at least  $1 - 2 \exp\left(-\frac{\varphi(n, M)\epsilon_n}{156 \frac{\xi}{1-\xi} + 28 \log 2}\right) - n^{-2}$ .



120 **Proof of Lemma 3.** We first provide a probabilistic upper bound for  $J(\hat{\alpha})$ . Note that

$$\begin{aligned}\mathcal{L}(\Theta^*, \mathcal{A}) &= \frac{1}{\varphi(n, M)} \sum_{m=1}^M \sum_{i \leq j} L(\theta_{i,j,m}^*; a_{i,j,m}) \\ &= \frac{1}{\varphi(n, M)} \sum_{m=1}^M \sum_{i \leq j} \left( a_{i,j,m} \log \frac{1 - p_{i,j,m}^*}{p_{i,j,m}} + \log \frac{1}{1 - p_{i,j,m}^*} \right).\end{aligned}$$

Denote  $X_{i,j,m} = a_{i,j,m} \log \frac{1 - p_{i,j,m}^*}{p_{i,j,m}} + \log \frac{1}{1 - p_{i,j,m}^*}$ , for  $i \leq j, m \in [M]$ . It follows that  $\mathcal{L}(\Theta^*, \mathcal{A})$  is the average of  $\varphi(n, M)$  independent two-value random variables with  $|X_{i,j,m}| \leq c_6 \log \frac{1}{s_n}$ ,  $\mathbb{E}X_{i,j,m} \leq c_6 s_n \log \frac{1}{s_n}$  and  $\mathbb{E}X_{i,j,m}^2 \leq c_6 s_n (\log \frac{1}{s_n})^2$ , where  $c_6$  is a constant that depends on  $\xi$  only. By Bernstein inequality, for any  $t > 0$ ,

$$P\left(\frac{1}{\varphi(n, M)} \sum_{m=1}^M \sum_{i \leq j} (X_{i,j,m} - \mathbb{E}X_{i,j,m}) > t\right) \leq \exp\left\{-\frac{\frac{1}{2}\varphi^2(n, M)t^2}{c_5\varphi(n, M)s_n(\log \frac{1}{s_n})^2 + c_5\varphi(n, M)t \log \frac{1}{s_n}/3}\right\}.$$

Taking  $t = \sqrt{6c_6}\varphi^{-1/2}(n, M)s_n^{1/2}(\log \frac{1}{s_n})(\log n)^{1/2}$ , with probability at least  $1 - n^{-2}$ , we have

$$\lambda_n J(\hat{\alpha}) < \mathcal{L}_\lambda(\hat{\Theta}; \mathcal{A}) \leq \mathcal{L}_\lambda(\Theta^*; \mathcal{A}) + \epsilon_n \leq \frac{1}{\varphi(n, M)} \sum_{m=1}^M \sum_{i \leq j} \mathbb{E}X_{i,j,m} + t + \epsilon_n \leq c_6 s_n \log \frac{1}{s_n} + t + \epsilon_n.$$

121 Clearly  $t = o(s_n \log \frac{1}{s_n})$  and  $\epsilon_n = o(s_n \log \frac{1}{s_n})$ . Thus, the assumption  $\lambda_n \epsilon_n s_n^{-2} (\log s_n^{-1})^{-1} \geq c_2$   
122 immediately implies that  $J(\hat{\alpha}) \leq \frac{(c_7-1)^2}{4} \epsilon_n s_n^{-1}$ , for some constant  $c_7 > 1$ , with probability at least  
123  $1 - n^{-2}$ .

124 We now turn to bound the difference between  $\mathcal{I} \times_1 \hat{\mathbf{Z}} \hat{\mathbf{C}} \times_2 \hat{\mathbf{Z}} \hat{\mathbf{C}} \times_3 \hat{\beta}$  and  $\mathcal{I} \times_1 \mathbf{Z}^* \mathbf{C}^* \times_2 \mathbf{Z}^* \mathbf{C}^* \times_3 \beta^*$ .  
125 Applying the triangle inequality and Lemma 1 yields that

$$\begin{aligned}& \frac{1}{n\sqrt{M}} \|\mathcal{I} \times_1 \hat{\alpha} \times_2 \hat{\alpha} \times_3 \hat{\beta} - \mathcal{I} \times_1 \hat{\mathbf{Z}} \hat{\mathbf{C}} \times_2 \hat{\mathbf{Z}} \hat{\mathbf{C}} \times_3 \hat{\beta}\|_F \\ & \leq \frac{1}{n\sqrt{M}} \|\hat{\alpha} - \hat{\mathbf{Z}} \hat{\mathbf{C}}\|_F (\|\hat{\alpha}\|_F + \|\hat{\mathbf{Z}} \hat{\mathbf{C}}\|_F) \min\{\sqrt{M}, \sqrt{R}\} \\ & \leq 2\sqrt{\frac{\log \frac{\xi}{1-\xi}}{M}} \sqrt{(1+\delta)J(\hat{\alpha})} \min\{\sqrt{M}, \sqrt{R}\} \\ & \leq (c_7 - 1) \sqrt{\frac{\min\{M, R\}}{M}} \sqrt{(1+\delta)\epsilon_n s_n^{-1} \log \frac{\xi}{1-\xi}},\end{aligned}\tag{5}$$

126 with probability at least  $1 - 2 \exp\left(-\frac{\varphi(n, M)\epsilon_n}{156 \frac{\xi}{1-\xi} + 28 \log 2}\right) - n^{-2}$ . Similarly,

$$\begin{aligned}& \frac{1}{n\sqrt{M}} \|\mathcal{I} \times_1 \alpha^* \times_2 \alpha^* \times_3 \beta^* - \mathcal{I} \times_1 \mathbf{Z}^* \mathbf{C}^* \times_2 \mathbf{Z}^* \mathbf{C}^* \times_3 \beta^*\|_F \\ & \leq 2\sqrt{\frac{\min\{M, R\}}{M}} \sqrt{J(\alpha^*) \log \frac{\xi}{1-\xi}} = o\left(\sqrt{\frac{\min\{M, R\}}{M}} \sqrt{\epsilon_n s_n^{-1} \log \frac{\xi}{1-\xi}}\right),\end{aligned}\tag{6}$$

127 where the equality follows from  $\lambda_n J(\alpha^*) \leq \epsilon_n$  and Assumption B. Finally, by (5), (6) and Theorem  
128 1, we have

$$\begin{aligned}& \frac{1}{n\sqrt{M}} \|\mathcal{I} \times_1 \hat{\mathbf{Z}} \hat{\mathbf{C}} \times_2 \hat{\mathbf{Z}} \hat{\mathbf{C}} \times_3 \hat{\beta} - \mathcal{I} \times_1 \mathbf{Z}^* \mathbf{C}^* \times_2 \mathbf{Z}^* \mathbf{C}^* \times_3 \beta^*\|_F \\ & \leq \frac{1}{n\sqrt{M}} \|\mathcal{I} \times_1 \hat{\mathbf{Z}} \hat{\mathbf{C}} \times_2 \hat{\mathbf{Z}} \hat{\mathbf{C}} \times_3 \hat{\beta} - \hat{\Theta}\|_F + \frac{1}{n\sqrt{M}} \|\hat{\Theta} - \Theta^*\|_F \\ & \quad + \frac{1}{n\sqrt{M}} \|\Theta^* - \mathcal{I} \times_1 \mathbf{Z}^* \mathbf{C}^* \times_2 \mathbf{Z}^* \mathbf{C}^* \times_3 \beta^*\|_F \\ & \leq \left(\frac{4\sqrt{2}}{(1-\xi)\sqrt{\xi}} + c_7 \sqrt{\frac{\min\{M, R\}}{M}} \sqrt{(1+\delta) \log \frac{\xi}{1-\xi}}\right) \sqrt{\epsilon_n s_n^{-1}}.\end{aligned}$$

129 The desired result follows by taking  $c_3 = c_7 \sqrt{\log \frac{\xi}{1-\xi}}$ .

130

**Lemma 4.** Let  $\hat{\mathcal{B}} = \mathcal{I} \times_1 \hat{\mathcal{C}} \times_2 \hat{\mathcal{C}} \times_3 \hat{\mathcal{B}}$  be the estimation counterpart of  $\mathcal{B}^*$ . Denote  $\mathcal{M}^* = \mathcal{B}^* \times_2 \mathcal{Z}^*$  and  $\hat{\mathcal{M}} = \hat{\mathcal{B}} \times_2 \hat{\mathcal{Z}}$ . Under the conditions of Lemma 3 and Assumption A and C, then with probability at least  $1 - 2 \exp\left(-\frac{\varphi(n, M)\epsilon_n}{156 \frac{\xi}{1-\xi} + 28 \log 2}\right) - n^{-2}$ , the following event  $F$  holds.  $F$ : for any  $k \in [K]$ , there exists a unique  $k' \in [K]$ , such that

$$\frac{1}{\sqrt{nM}} \|\hat{\mathcal{M}}_{k', \dots} - \mathcal{M}_{k, \dots}^*\|_F = o(\gamma_n \sqrt{\frac{n_{\min} K}{n}}).$$

131 **Proof of Lemma 4.** Denote  $F_0$  be the event that there exists  $k \in [K]$  such that  $\frac{1}{\sqrt{nM}} \|\hat{\mathcal{M}}_{k', \dots} -$   
132  $\mathcal{M}_{k, \dots}^*\|_F \geq \gamma_n \sqrt{\frac{n_{\min} K}{n}}$ , for any  $k' \in [K]$  and sufficiently large  $n$  and  $M$ . It follows that

$$\begin{aligned} \frac{1}{n\sqrt{M}} \|\hat{\mathcal{B}} \times_1 \hat{\mathcal{Z}} \times_2 \hat{\mathcal{Z}} - \mathcal{B}^* \times_1 \mathcal{Z}^* \times_2 \mathcal{Z}^*\|_F &\geq \frac{1}{n\sqrt{M}} \left( \sum_{i \in N_k^*} \|(\hat{\mathcal{M}} \times_1 \hat{\mathcal{Z}})_{i, \dots} - \mathcal{M}_{k, \dots}^*\|_F^2 \right)^{1/2} \\ &\geq \gamma_n \sqrt{\frac{n_{\min} K}{n}} \sqrt{\frac{n_k}{n}} \geq \frac{\gamma_n n_{\min} \sqrt{K}}{n}. \end{aligned}$$

133 However, it follows from Lemma 3 and the Assumption C that

$$\begin{aligned} P(F_0) &\leq P\left(\frac{1}{n\sqrt{M}} \|\hat{\mathcal{B}} \times_1 \hat{\mathcal{Z}} \times_2 \hat{\mathcal{Z}} - \mathcal{B}^* \times_1 \mathcal{Z}^* \times_2 \mathcal{Z}^*\|_F \geq \frac{\gamma_n n_{\min} \sqrt{K}}{n}\right) \\ &\leq 2 \exp\left(-\frac{\varphi(n, M)\epsilon_n}{156 \frac{\xi}{1-\xi} + 28 \log 2}\right) + n^{-2}. \end{aligned}$$

134 Therefore, with probability at least  $1 - 2 \exp\left(-\frac{\varphi(n, M)\epsilon_n}{156 \frac{\xi}{1-\xi} + 28 \log 2}\right) - n^{-2}$ ,  $F_0^c$ , the complement of  
135  $F_0$  holds; that is, the existence holds with high probability.

We now prove the uniqueness under  $F_0^c$ . Assume there exist  $k_1 \neq k_2 \in [K]$  such that  $\frac{1}{\sqrt{nM}} \|\hat{\mathcal{M}}_{k_1, \dots} - \mathcal{M}_{k_1, \dots}^*\|_F = o(\gamma_n \sqrt{\frac{n_{\min} K}{n}})$ , for  $i \in [2]$ . By existence, there exists  $a \in [K]$  and  $b_1 \neq b_2 \in [K]$  such that  $\frac{1}{\sqrt{nM}} \|\hat{\mathcal{M}}_{a, \dots} - \mathcal{M}_{b_1, \dots}^*\|_F = o(\gamma_n \sqrt{\frac{n_{\min} K}{n}})$ , for  $j \in [2]$ . The triangle inequality implies that

$$\frac{1}{\sqrt{nM}} \|\mathcal{M}_{b_1, \dots}^* - \mathcal{M}_{b_2, \dots}^*\|_F \leq \frac{1}{\sqrt{nM}} \left( \|\hat{\mathcal{M}}_{a, \dots} - \mathcal{M}_{b_1, \dots}^*\|_F + \|\hat{\mathcal{M}}_{a, \dots} - \mathcal{M}_{b_2, \dots}^*\|_F \right) = o(\gamma_n \sqrt{\frac{n_{\min} K}{n}}).$$

On the other hand, Assumption A implies that

$$\frac{1}{\sqrt{nM}} \|\mathcal{M}_{b_1, \dots}^* - \mathcal{M}_{b_2, \dots}^*\|_F \geq \sqrt{\frac{n_{\min}}{nM}} \|\mathcal{B}_{b_1, \dots}^* - \mathcal{B}_{b_2, \dots}^*\|_F \geq \sqrt{\frac{n_{\min} K}{n}} \gamma_n,$$

136 which is a contradiction. Hence,  $F_0^c$  also implies uniqueness, showing that  $F$  holds with probability  
137 at least  $1 - 2 \exp\left(-\frac{\varphi(n, M)\epsilon_n}{156 \frac{\xi}{1-\xi} + 28 \log 2}\right) - n^{-2}$ .  $\square$

138 **Proof of Theorem 2.** Based on Lemma 4, with probability at least  $1 - 2 \exp\left(-\frac{\varphi(n, M)\epsilon_n}{156 \frac{\xi}{1-\xi} + 28 \log 2}\right) -$   
139  $n^{-2}$ , there exists a permutation  $\pi^* \in S_K$  such that for each  $k \in [K]$ ,  $\frac{1}{\sqrt{nM}} \|\hat{\mathcal{M}}_{\pi^*(k), \dots} - \mathcal{M}_{k, \dots}^*\|_F =$   
140  $o(\gamma_n \sqrt{\frac{n_{\min} K}{n}})$ . It then suffices to show that with probability at least  $1 - 2 \exp\left(-\frac{\varphi(n, M)\epsilon_n}{156 \frac{\xi}{1-\xi} + 28 \log 2}\right) -$   
141  $n^{-2}$ , it holds true that  $\min_{\pi \in S_K} \frac{1}{n} \sum_{i=1}^n \mathbf{1}\{\psi_i^* \neq \pi(\hat{\psi}_i)\} \leq \frac{c_\xi^2 n \epsilon_n}{n_{\min} K \gamma_n^2 s_n}$ . Let  $\hat{N}_k = \{i : \hat{\psi}_i = k\}$ , for  
142  $k \in [K]$ . Note that

$$\min_{\pi \in S_K} \sum_{i=1}^n \mathbf{1}\{\psi_i^* \neq \pi(\hat{\psi}_i)\} = \min_{\pi \in S_K} \sum_{k=1}^K |N_k^* \setminus \hat{N}_{\pi^{-1}(k)}| = \min_{\pi \in S_K} \sum_{k=1}^K |N_k^* \setminus \hat{N}_{\pi(k)}|,$$

143 where the last equality follows from the fact that  $\pi^{-1}$  is also a permutation in  $S_K$ . It then suffices to  
 144 show that with probability at least  $1 - 2 \exp\left(-\frac{\varphi(n, M)\epsilon_n}{156\frac{\xi}{1-\xi} + 28 \log 2}\right) - n^{-2}$ ,  $\frac{1}{n} \sum_{k=1}^K |N_k^* \setminus \hat{N}_{\pi^*(k)}| \leq$   
 145  $\frac{c_\xi^2 n \epsilon_n}{n_{\min} K \gamma_n^2 s_n}$  for the particular permutation  $\pi^*$ . Let  $F$  denote the same event in Lemma 4. In fact, by  
 146 Lemma 3, we have

$$\begin{aligned} & P\left(\frac{1}{n} \sum_{k=1}^K |N_k^* \setminus \hat{N}_{\pi^*(k)}| \leq \frac{c_\xi^2 n \epsilon_n}{n_{\min} K \gamma_n^2 s_n} \middle| F\right) = P\left(\frac{n_{\min} K \gamma_n^2}{n^2} \sum_{k=1}^K |N_k^* \setminus \hat{N}_{\pi^*(k)}| = \frac{c_\xi^2 \epsilon_n}{s_n} \middle| F\right) \\ & \geq P\left(\frac{n_{\min} K \gamma_n^2}{n^2} \sum_{k=1}^K |N_k^* \setminus \hat{N}_{\pi^*(k)}| \leq \frac{1}{n^2 M} \|\hat{\mathbf{B}} \times_1 \hat{\mathbf{Z}} \times_2 \hat{\mathbf{Z}} - \mathbf{B}^* \times_1 \mathbf{Z}^* \times_2 \mathbf{Z}^*\|_F^2 \middle| F\right) + \\ & \quad P\left(\frac{1}{n^2 M} \|\hat{\mathbf{B}} \times_1 \hat{\mathbf{Z}} \times_2 \hat{\mathbf{Z}} - \mathbf{B}^* \times_1 \mathbf{Z}^* \times_2 \mathbf{Z}^*\|_F^2 \leq \frac{c_\xi^2 \epsilon_n}{s_n} \middle| F\right) - 1 \\ & = P\left(\frac{n_{\min} K \gamma_n^2}{n^2} \sum_{k=1}^K |N_k^* \setminus \hat{N}_{\pi^*(k)}| \leq \frac{1}{n^2 M} \|\hat{\mathbf{B}} \times_1 \hat{\mathbf{Z}} \times_2 \hat{\mathbf{Z}} - \mathbf{B}^* \times_1 \mathbf{Z}^* \times_2 \mathbf{Z}^*\|_F^2 \middle| F\right), \end{aligned}$$

147 where the last equality comes from the fact that the event  $F$  is based on the resultant inequality of  
 148 Lemma 3. Furthermore, note that

$$\begin{aligned} & \frac{1}{n^2 M} \|\hat{\mathbf{B}} \times_1 \hat{\mathbf{Z}} \times_2 \hat{\mathbf{Z}} - \mathbf{B}^* \times_1 \mathbf{Z}^* \times_2 \mathbf{Z}^*\|_F^2 \geq \frac{1}{n^2 M} \sum_{k=1}^K \sum_{i \in N_k^* \setminus \hat{N}_{\pi^*(k)}} \|(\hat{\mathbf{M}} \times_1 \hat{\mathbf{Z}})_{i,\dots} - \mathbf{M}_{k,\dots}^*\|_F^2 \\ & \geq \frac{1}{n^2 M} \sum_{k=1}^K \sum_{i \in N_k^* \setminus \hat{N}_{\pi^*(k)}} \left( \frac{\|\mathbf{M}_{(\pi^*)^{-1}(\hat{\psi}_i),\dots}^* - \mathbf{M}_{k,\dots}^*\|_F^2}{2} - \|\hat{\mathbf{M}}_{\hat{\psi}_i,\dots} - \mathbf{M}_{(\pi^*)^{-1}(\hat{\psi}_i),\dots}^*\|_F^2 \right) \\ & \geq \sum_{k=1}^K \frac{|N_k^* \setminus \hat{N}_{\pi^*(k)}|}{n^2 M} \min_{i \in N_k^* \setminus \hat{N}_{\pi^*(k)}} \left( \frac{1}{2} \|\mathbf{M}_{(\pi^*)^{-1}(\hat{\psi}_i),\dots}^* - \mathbf{M}_{k,\dots}^*\|_F^2 - \|\hat{\mathbf{M}}_{\hat{\psi}_i,\dots} - \mathbf{M}_{(\pi^*)^{-1}(\hat{\psi}_i),\dots}^*\|_F^2 \right) \\ & \geq \sum_{k=1}^K \frac{|N_k^* \setminus \hat{N}_{\pi^*(k)}|}{n^2 M} \left( \frac{1}{2} n_{\min} M K \gamma_n^2 - \max_{i \in N_k^* \setminus \hat{N}_{\pi^*(k)}} \|\hat{\mathbf{M}}_{\hat{\psi}_i,\dots} - \mathbf{M}_{(\pi^*)^{-1}(\hat{\psi}_i),\dots}^*\|_F^2 \right). \end{aligned}$$

149 Here we use the fact that  $\min_{i \in N_k^* \setminus \hat{N}_{\pi^*(k)}} \frac{1}{nM} \|\mathbf{M}_{(\pi^*)^{-1}(\hat{\psi}_i),\dots}^* - \mathbf{M}_{k,\dots}^*\|_F^2 \geq \frac{n_{\min} K}{n} \gamma_n^2$  according to  
 150 Assumption A. Consequently,

$$\begin{aligned} & P\left(\frac{1}{n} \sum_{k=1}^K |N_k^* \setminus \hat{N}_{\pi^*(k)}| \leq \frac{c_\xi^2 n \epsilon_n}{n_{\min} K \gamma_n^2 s_n} \middle| F\right) \\ & \geq P\left(\frac{n_{\min} K \gamma_n^2}{n^2} \sum_{k=1}^K |N_k^* \setminus \hat{N}_{\pi^*(k)}| \leq \right. \\ & \quad \left. \sum_{k=1}^K \frac{|N_k^* \setminus \hat{N}_{\pi^*(k)}|}{n^2 M} \left( \frac{1}{2} n_{\min} M K \gamma_n^2 - \max_{i \in N_k^* \setminus \hat{N}_{\pi^*(k)}} \|\hat{\mathbf{M}}_{\hat{\psi}_i,\dots} - \mathbf{M}_{(\pi^*)^{-1}(\hat{\psi}_i),\dots}^*\|_F^2 \right) \middle| F\right) \\ & \geq P\left(\bigcap_{k=1}^K \left( \left\{ \frac{n_{\min} K \gamma_n^2}{n^2} \leq \frac{n_{\min} K \gamma_n^2}{2n^2} - \max_{i \in N_k^* \setminus \hat{N}_{\pi^*(k)}} \frac{1}{n^2 M} \|\hat{\mathbf{M}}_{\hat{\psi}_i,\dots} - \mathbf{M}_{(\pi^*)^{-1}(\hat{\psi}_i),\dots}^*\|_F^2 \right\} \cap F \right) \right) \\ & \geq P\left(\bigcap_{k=1}^K \left( \left\{ \max_{i \in N_k^* \setminus \hat{N}_{\pi^*(k)}} \frac{1}{nM} \|\hat{\mathbf{M}}_{\hat{\psi}_i,\dots} - \mathbf{M}_{(\pi^*)^{-1}(\hat{\psi}_i),\dots}^*\|_F^2 = o\left(\frac{n_{\min} K \gamma_n^2}{n}\right) \right\} \cap F \right) \right) = 1, \end{aligned}$$

151 where the last equality is suggested by Lemma 4. Finally, by the definition of conditional probability,

$$\begin{aligned}
P\left(\frac{1}{n} \sum_{k=1}^K |N_k^* \setminus \hat{N}_{\pi^*(k)}| \leq \frac{c_\xi^2 n \epsilon_n}{n_{\min} K \gamma_n^2 s_n}\right) &= P\left(\frac{1}{n} \sum_{k=1}^K |N_k^* \setminus \hat{N}_{\pi^*(k)}| \leq \frac{c_\xi^2 n \epsilon_n}{n_{\min} K \gamma_n^2 s_n} \mid F\right) \cdot P(F) \\
&\geq 1 - 2 \exp\left(-\frac{\varphi(n, M) \epsilon_n}{156 \frac{\xi}{1-\xi} + 28 \log 2}\right) - n^{-2},
\end{aligned}$$

152 and thus the desired consistency result follows immediately.  $\square$

## 153 References

- 154 [1] Pengsheng Ji and Jiashun Jin. Coauthorship and citation networks for statisticians. *The Annals*  
155 *of Applied Statistics*, 10(4):1779–1812, 2016.
- 156 [2] Thierry Klein and Emmanuel Rio. Concentration around the mean for maxima of empirical  
157 processes. *Ann. Prob.*, 33(3):1060–1077, 2005.
- 158 [3] Vladimir Koltchinskii. *Oracle Inequalities in Empirical Risk Minimization and Sparse Recovery*  
159 *Problems: Ecole d’Eté de Probabilités de Saint-Flour XXXVIII-2008*, volume 2033. Springer  
160 Science & Business Media, 2011.
- 161 [4] Karl Rohe, Tai Qin, and Bin Yu. Co-clustering directed graphs to discover asymmetries and  
162 directional communities. *Proceedings of the National Academy of Sciences*, 113(45):12679–  
163 12684, 2016.
